# Supplementary material
Source: PubMed Central journal article supplement (PMC6058776)
Supplement: 2017.186304.SAULTIER_SUPPL.pdf [file 2017.186304.SAULTIER_SUPPL.pdf]

**Long-term management of leukocyte adhesion deficiency type III without hematopoietic stem cell transplantation**

*Paul Saultier,<sup>1,2</sup> Sarah Szeptowski,<sup>1</sup> Matthias Canault,<sup>2</sup> Céline Falaise,<sup>1,3,4</sup> Marjorie Poggi,<sup>2</sup> Pierre Suchon,<sup>2,3</sup> Vincent Barlogis,<sup>1,5</sup> Gérard Michel,<sup>1,5</sup> Stéphane Loyau,<sup>6</sup> Martine Jandrot-Perrus,<sup>6</sup> Jean-Claude Bordet,<sup>7,8</sup> Marie-Christine Alessi<sup>2,3,4</sup> and Hervé Chambost<sup>1,2</sup>*

<sup>1</sup>APHM, La Timone Children's Hospital, Department of pediatric hematology and oncology, Marseille; <sup>2</sup>Aix Marseille Univ, INSERM, INRA, C2VN; <sup>3</sup>APHM, CHU Timone, Laboratory of Hematology, Marseille; <sup>4</sup>APHM, CHU Timone, French national reference center for inherited platelet disorders (CRPP), Marseille; <sup>5</sup>APHM, La Timone Children's Hospital, French national reference center for primary immune deficiencies (CEREDIH), Marseille; <sup>6</sup>Laboratory of Vascular Translational Science, U1148 Institut National de la Santé et de la Recherche Médicale (INSERM), Univ Paris Diderot, Sorbonne Paris Cité; <sup>7</sup>HCL, Hôpital Cardiologique Louis Pradel, Unité d'Hémostase Biologique, Bron, and <sup>8</sup>EAM 4609 Hémostase et cancer, Université Claude Bernard Lyon 1, France

Correspondence: [paul.saultier@gmail.com](mailto:paul.saultier@gmail.com)  
doi:10.3324/haematol.2017.186304

## **SUPPLEMENTAL MATERIAL**

**Long-term management of leukocyte adhesion deficiency  
type III without hematopoietic stem cell transplantation**

**Supplemental Table: Complications, therapeutic management and outcome of previously reported LAD-III patients**

| FERMT3 alteration                          | Gender (M / F) | HSCT<br>Age at conditioning, donor, conditioning regimen, complications, outcome                                     | Bleeding complications                                 |                                      | Infections                                                                                                                               |                                                                                                       | Survival (Y / N) | Supplemental references |
|--------------------------------------------|----------------|----------------------------------------------------------------------------------------------------------------------|--------------------------------------------------------|--------------------------------------|------------------------------------------------------------------------------------------------------------------------------------------|-------------------------------------------------------------------------------------------------------|------------------|-------------------------|
|                                            |                |                                                                                                                      | Description                                            | Management                           | Description                                                                                                                              | Management                                                                                            |                  |                         |
| c.48G>A<br>p.W16X                          | M              | Yes                                                                                                                  | Mucosal bleedings,<br>CNS bleeding                     | RBC TF                               | Lymphadenitis, Recurrent infections                                                                                                      | NA                                                                                                    | Y                | 1                       |
| c.48G>A<br>p.W16X                          | F              | Yes                                                                                                                  | Mucocutaneous bleedings, CNS bleeding                  | Platelet TF                          | Recurrent infections                                                                                                                     | NA                                                                                                    | Y                | 1                       |
| -----                                      |                |                                                                                                                      |                                                        |                                      |                                                                                                                                          |                                                                                                       |                  |                         |
| c.687G>A<br>p.W229X                        | NA             | Yes, †                                                                                                               | Moderate bleeding tendency                             | NA                                   | NA                                                                                                                                       | NA                                                                                                    | N                | 2,3                     |
| -----                                      |                |                                                                                                                      |                                                        |                                      |                                                                                                                                          |                                                                                                       |                  |                         |
| c.687G>A<br>p.W229X                        | M              | 6 years, MMRD, RIC (alemtuzumab/Bu/Flu/Mel), †                                                                       | Mucocutaneous bleedings<br>Life-threatening bleedings  | Platelet and RBC TF, Tranexamic acid | Omphalitis, Recurrent soft tissue infections, Bacteremia (Staphylococcus), Osteomyelitis, CMV viremia, Disseminated fungal infection (†) | ATB therapy, granulocyte TF, surgical debridement, ATB prophylaxis, ganciclovir, antifungal treatment | N                | 4,5                     |
| c.687G>A<br>p.W229X                        | F              | 21 and 51 months, MMUCBD 5/6 and MMUD 8/10, MAC (Bu/Cy/ATG) and RIC (Flu/Treo/TT/ATG), GvHD (Grade IV), good outcome | Mucocutaneous bleedings,<br>Gastrointestinal bleedings | Platelet and RBC TF                  | Pneumocystis pulmonary infection,<br>Recurrent CMV viremia                                                                               | ATB therapy, ganciclovir                                                                              | Y                | 5                       |
| -----                                      |                |                                                                                                                      |                                                        |                                      |                                                                                                                                          |                                                                                                       |                  |                         |
| c.687G>A<br>p.W229X                        | M              | 12 months, MRD, RIC (Flu/Treo/TT/Alemtuzumab), no GvHD, good outcome                                                 | Cutaneous bleeding                                     | Platelet and RBC TF                  | Recurrent pulmonary infections, Cellulitis, Gangrene, Deep-seated abscesses, Intestinal infection, Bacteremia (Pseudomonas, Klebsiella)  | ATB therapy, amputation                                                                               | Y                | 5                       |
| -----                                      |                |                                                                                                                      |                                                        |                                      |                                                                                                                                          |                                                                                                       |                  |                         |
| c.[922G>A;1287delT]<br>p.[G308R;E430Rfs*3] | F              | 8 months, MMUCBD 5/6, RIC (Flu/Bu/Cy/rabbit ATG), skin and gut GvHD (Grade III), good outcome                        | Gastrointestinal bleedings, Traumatic hematomas        | Platelet and RBC TF                  | Necrotizing enterocolitis, RSV pulmonary infection, Urinary tract infection (E. coli, P. aeruginosa), Bacteremia (S. aureus)             | ATB therapy, Partial bowel resection                                                                  | Y                | 6,7                     |
| -----                                      |                |                                                                                                                      |                                                        |                                      |                                                                                                                                          |                                                                                                       |                  |                         |

|                            |   |                                                                                       |                                                          |                     |                                                                                                                                                                          |                                                                                    |   |           |
|----------------------------|---|---------------------------------------------------------------------------------------|----------------------------------------------------------|---------------------|--------------------------------------------------------------------------------------------------------------------------------------------------------------------------|------------------------------------------------------------------------------------|---|-----------|
| c.1324-1G>A splice variant | F | No HSCT                                                                               | Joint bleedings (knee, elbow), Mucocutaneous bleedings   | NA                  | Pulmonary infection, Otitis media, Arthritis, Recurrent CMV viremia                                                                                                      | ATB therapy, ganciclovir                                                           | Y | 8         |
| c.1438C>T p.Q480X          | M | 8 months, MRD, Good outcome                                                           | Mucosal bleedings                                        | NA                  | Omphalitis, Urachal duct cyst infection, Soft tissue infection, Bacteremia (Staphylococcus), Pneumocystis pulmonary infection, Oral candidiasis; Urinary tract infection | ATB therapy                                                                        | Y | 9-11      |
| c.1438C>T p.Q480X          | M | 15 weeks, Good outcome                                                                | Cutaneous bleedings                                      | NA                  | Oral candidiasis, Omphalitis, Bacteremia (Staphylococcus)                                                                                                                | ATB therapy                                                                        | Y | 9         |
| c.1537C>T p.R513X          | F | MUD, GvHD (†)                                                                         | Gastrointestinal bleedings, Hematuria, Mucosal bleedings | Platelet and RBC TF | Recurrent pulmonary infections, Bacteremia (†)                                                                                                                           | NA                                                                                 | N | 12        |
| c.1537C>T p.R513X          | M | Good outcome                                                                          | Gastrointestinal bleedings, Hematuria, Mucosal bleedings | Platelet and RBC TF | Recurrent pulmonary infections                                                                                                                                           | NA                                                                                 | Y | 12        |
| c.1537C>T p.R513X          | M | No HSCT                                                                               | Severe mucocutaneous bleedings                           | Platelet and RBC TF | Bacteremia and fungemia                                                                                                                                                  | NA                                                                                 | N | 13        |
| c.1537C>T p.R513X          | M | No HSCT                                                                               | Cutaneous bleedings, Pulmonary hemorrhage (†)            | NA                  | Recurrent pulmonary infections, Intestinal infection, Bacteremia (P. aeruginosa), Oral candidiasis                                                                       | NA                                                                                 | N | 13,14     |
| c.1537C>T p.R513X          | F | 3.5 years, MMRD x 2, RIC (Flu/Mel/TT/rabbit ATG) and MAC (Bu/Cy/TLNI), no engraftment | Severe bleeding tendency                                 | Platelet and RBC TF | Recurrent pulmonary infections, buccal infection (P. aeruginosa)                                                                                                         | ATB therapy                                                                        | Y | 13-15     |
| c.1537C>T p.R513X          | F | No HSCT                                                                               | Mucocutaneous bleedings, Pulmonary hemorrhage (†)        | Platelet and RBC TF | Pulmonary infections, Otitis media, Bacteremia (†)                                                                                                                       | ATB therapy                                                                        | N | 13,14     |
| c.1537C>T p.R513X          | M | 13 years, MUD, †                                                                      | Mucosal bleedings, Postoperative thoracic bleeding       | Platelet and RBC TF | Perianal abscesses, Pulmonary infection, Bacteremia (P. aeruginosa), Mediastinal mass                                                                                    | ATB therapy, ATB prophylaxis, Ig replacement therapy, granulocyte TF, voriconazole | N | 2,3,16,17 |

|                      |   |                                                       |                                                               |                     |                                                                                            |                                                           |   |        |
|----------------------|---|-------------------------------------------------------|---------------------------------------------------------------|---------------------|--------------------------------------------------------------------------------------------|-----------------------------------------------------------|---|--------|
| c.1537C>T<br>p.R513X | M | 4 years, Good outcome                                 | Severe bleeding tendency, Cutaneous bleedings                 | Platelet and RBC TF | Perianal abscesses, Candidiasis                                                            | NA                                                        | Y | 2,3,16 |
| c.1537C>T<br>p.R513X | M | 1 year, Sinusoidal obstruction syndrome (†)           | Severe bleeding tendency, CNS bleeding                        | Platelet and RBC TF | Pulmonary aspergillosis                                                                    | Amphotericin B                                            | N | 2,3,16 |
| c.1537C>T<br>p.R513X | M | No HSCT                                               | Severe bleeding tendency                                      | Platelet and RBC TF | Omphalitis, Fungemia (F. oxysporum), Soft tissue infection, Bacteremia (P. aeruginosa) (†) | ATB therapy, Amphotericin B, flucytosine, granulocytes TF | N | 2,3,16 |
| c.1537C>T<br>p.R513X | M | No HSCT                                               | Severe traumatic epistaxis (†)                                | Platelet and RBC TF | Bacterial infections                                                                       | NA                                                        | N | 2,3,16 |
| c.1537C>T<br>p.R513X | M | Yes                                                   | Severe bleeding tendency, CNS bleeding                        | Platelet and RBC TF | Omphalitis, Perianal abscesses, CMV infections                                             | ATB therapy                                               | Y | 2,3,16 |
| c.1537C>T<br>p.R513X | F | No HSCT                                               | Moderate bleeding tendency                                    | Platelet and RBC TF | NA                                                                                         | NA                                                        | Y | 2,3,16 |
| c.1537C>T<br>p.R513X | F | No HSCT                                               | Moderate bleeding tendency                                    | Platelet and RBC TF | NA                                                                                         | NA                                                        | Y | 2,3,16 |
| c.1537C>T<br>p.R513X | M | No HSCT                                               | Moderate bleeding tendency<br>Mucocutaneous bleedings         | Platelet and RBC TF | Sepsis, CMV infection                                                                      | NA                                                        | Y | 2,3,16 |
| c.1537C>T<br>p.R513X | F | No HSCT                                               | Hematuria,<br>Gastrointestinal bleedings, Cutaneous bleedings | RBC TF              | Cutaneous ulcers, Cellulitis, Bacteremia                                                   | NA                                                        | Y | 18     |
| c.1597C>T<br>p.Q533X | F | 5 months, MUD, RIC (Bu/Flu/TT), no GvHD, Good outcome | Gastrointestinal bleedings, Vaginal bleedings                 | Platelet and RBC TF | Presumed amnion infection                                                                  | ATB therapy                                               | Y | 19     |

|                               |    |                                                                                    |                                                  |                                 |                                                                                                                                                                                                                                                         |                                        |   |         |
|-------------------------------|----|------------------------------------------------------------------------------------|--------------------------------------------------|---------------------------------|---------------------------------------------------------------------------------------------------------------------------------------------------------------------------------------------------------------------------------------------------------|----------------------------------------|---|---------|
| c.1683-2A>G<br>splice variant | F  | Yes, Good outcome                                                                  | Antenatal CNS<br>bleeding, Cutaneous<br>bleeding | Platelet TF,<br>Tranexamic acid | Recurrent infections, Cutaneous ulcers                                                                                                                                                                                                                  | ATB therapy, ATB<br>prophylaxis        | Y | 7,18,20 |
| c.1729C>T<br>p.R577X          | M  | 7 years, MUD, MAC (Bu/Flu/Cy/Rabbit ATG),<br>GvHD (grade II), Good outcome         | Buccal bleedings,<br>Epistaxis                   | Platelet and RBC<br>TF          | Recurrent infections, Pulmonary infections,<br>bacteremia ( <i>S. pneumoniae</i> )                                                                                                                                                                      | ATB therapy                            | Y | 21      |
| c.1729C>T<br>p.R577X          | M  | 3.5 years, MUD, MAC (Bu/Flu/Cy), Chronic<br>lung GvHD (grade I)                    | Mucosal bleedings                                | NA                              | Recurrent infection, Pulmonary infections                                                                                                                                                                                                               | ATB therapy                            | Y | 21      |
| c.1729C>T<br>p.R577X          | NA | No HSCT                                                                            | Moderate bleeding<br>tendency                    | NA                              | NA                                                                                                                                                                                                                                                      | NA                                     | Y | 2,3     |
| c.1796A>C<br>p.Q599P          | F  | No HSCT                                                                            | Mild bleeding tendency                           | NA                              | Recurrent pulmonary infections ( <i>A.</i><br><i>baumanii</i> , <i>S. mitis</i> , <i>E. coli</i> ), Bacteremia ( <i>P.</i><br><i>aeruginosa</i> ), Mucocutaneous candidiasis,<br>Intestinal infection ( <i>Salmonella</i> ), Urinary<br>tract infection | ATB therapy, Ig<br>replacement therapy | Y | 22–24   |
| c.1802delA<br>p.N601Mfs*?     | F  | 2 months, MUUCBD, RIC (Flu/Treo/TT/rabbit<br>ATG), Liver and skin GvHD (grade III) | Cutaneous bleedings                              | NA                              | Pulmonary candidiasis, CMV viremia                                                                                                                                                                                                                      | NA                                     | Y | 25      |
| c.1857delG<br>p.A620Pfs*?     | NA | 14 months, MUUCBD, good outcome                                                    | Cutaneous bleeding,<br>Epistaxis                 | NA                              | Pneumocystis pulmonary infection                                                                                                                                                                                                                        | NA                                     | Y | 26,27   |

*FERMT3* variants were numbered according to the reference sequence NM\_178443. The conditioning regimen intensity was defined as previously described.<sup>28</sup> The affected families are separated using dotted lines. Abbreviations: †: death; ATB: antibiotic; ATG: anti-thymocyte globulin; Bu: busulfan; CMV: cytomegalovirus; CNS: central nervous system; Cy: cyclophosphamide; F: female; Flu: fludarabine; GvHD: graft versus host disease; HSCT: hematopoietic stem cell transplantation; Ig: immunoglobulin; M: male; MAC: myeloablative conditioning; Mel: melphalan; MMRD: mismatched related donor; MMUUCBD mismatched unrelated umbilical cord blood donor; MRD: matched related donor; MUD: matched unrelated donor; MUUCBD: matched unrelated umbilical cord blood donor; N: no; NA: not available; RBC: red blood cells; RIC: reduced intensity conditioning; RSV: respiratory syncytial virus; TF: infusion; TLNI: total lymph node irradiation; Treo: treosulfan; TT thiotepa; Y: yes.

## SUPPLEMENTAL REFERENCES

1. Malinin NL, Zhang L, Choi J, et al. A point mutation in KINDLIN3 ablates activation of three integrin subfamilies in humans. *Nat Med*. 2009;15(3):313–318.
2. Kuijpers TW, van de Vijver E, Weterman MAJ, et al. LAD-1/variant syndrome is caused by mutations in FERMT3. *Blood*. 2009;113(19):4740–4746.
3. van de Vijver E, Weterman MA, de Boer M, et al. Leukocyte Adhesion Deficiency-1/variant syndrome is caused by mutations in FERMT3. *Eur J Clin Invest*. 2009;39:32–32.
4. Alon R, Aker M, Feigelson S, et al. A novel genetic leukocyte adhesion deficiency in subsecond triggering of integrin avidity by endothelial chemokines results in impaired leukocyte arrest on vascular endothelium under shear flow. *Blood*. 2003;101(11):4437–4445.
5. Stepensky PY, Wolach B, Gavrieli R, et al. Leukocyte adhesion deficiency type III: clinical features and treatment with stem cell transplantation. *J Pediatr Hematol Oncol*. 2015;37(4):264–268.
6. Sabnis H, Kirpalani A, Horan J, et al. Leukocyte adhesion deficiency-III in an African-American patient. *Pediatr Blood Cancer*. 2010;55(1):180–182.
7. McDowall A, Svensson L, Stanley P, et al. Two mutations in the KINDLIN3 gene of a new leukocyte adhesion deficiency III patient reveal distinct effects on leukocyte function in vitro. *Blood*. 2010;115(23):4834–4842.
8. Meller J, Malinin NL, Panigrahi S, et al. Novel aspects of Kindlin-3 function in humans based on a new case of leukocyte adhesion deficiency III. *J Thromb Haemost JTH*. 2012;10(7):1397–1408.
9. Harris ES, Smith TL, Springett GM, Weyrich AS, Zimmerman GA. Leukocyte adhesion deficiency-I variant syndrome (LAD-Iv, LAD-III): molecular characterization of the defect in an index family. *Am J Hematol*. 2012;87(3):311–313.
10. Harris ES, Shigeoka AO, Li W, et al. A novel syndrome of variant leukocyte adhesion deficiency involving defects in adhesion mediated by beta1 and beta2 integrins. *Blood*. 2001;97(3):767–776.
11. Harris ES, Li W, Shigeoka AO, Zimmerman GA, Lorant DE. A new leukocyte-adhesion deficiency (LAD) variant characterized by defective signaling of beta 1 and beta 2 integrins in an Epstein-Barr (EB) virus-transformed cell line. *Am J Respir Crit Care Med*. 1999;159(3):A264–A264.

12. Aygun D, Nepesov S, Gershoni R, Camcioglu Y. Leukocyte Adhesion Deficiency III: Report of Two Siblings. *Pediatr Neonatol*. 2017;58(1):99–100.
13. Kilic SS, Etzioni A. The clinical spectrum of leukocyte adhesion deficiency (LAD) III due to defective CalDAG-GEF1. *J Clin Immunol*. 2009;29(1):117–122.
14. Pasvolsky R, Feigelson SW, Kilic SS, et al. A LAD-III syndrome is associated with defective expression of the Rap-1 activator CalDAG-GEFI in lymphocytes, neutrophils, and platelets. *J Exp Med*. 2007;204(7):1571–1582.
15. Elhasid R, Kilic SS, Ben-Arush M, Etzioni A, Rowe JM. Prompt recovery of recipient hematopoiesis after two consecutive haploidentical peripheral blood SCTs in a child with leukocyte adhesion defect III syndrome. *Bone Marrow Transplant*. 2010;45(2):413–414.
16. Kuijpers TW, Van Lier RA, Hamann D, et al. Leukocyte adhesion deficiency type 1 (LAD-1)/variant. A novel immunodeficiency syndrome characterized by dysfunctional beta2 integrins. *J Clin Invest*. 1997;100(7):1725–1733.
17. Kuijpers TW, van Bruggen R, Kamerbeek N, et al. Natural history and early diagnosis of LAD-1/variant syndrome. *Blood*. 2007;109(8):3529–3537.
18. Svensson L, Howarth K, McDowall A, et al. Leukocyte adhesion deficiency-III is caused by mutations in KINDLIN3 affecting integrin activation. *Nat Med*. 2009;15(3):306–312.
19. Crazzolara R, Maurer K, Schulze H, Zieger B, Zustin J, Schulz AS. A new mutation in the KINDLIN-3 gene ablates integrin-dependent leukocyte, platelet, and osteoclast function in a patient with leukocyte adhesion deficiency-III. *Pediatr Blood Cancer*. 2015;62(9):1677–1679.
20. McDowall A, Inwald D, Leitinger B, et al. A novel form of integrin dysfunction involving beta1, beta2, and beta3 integrins. *J Clin Invest*. 2003;111(1):51–60.
21. Jurk K, Schulz AS, Kehrel BE, et al. Novel integrin-dependent platelet malfunction in siblings with leukocyte adhesion deficiency-III (LAD-III) caused by a point mutation in FERMT3. *Thromb Haemost*. 2010;103(5):1053–1064.
22. Suratannon N, Yeetong P, Srichomthong C, et al. Adaptive immune defects in a patient with leukocyte adhesion deficiency type III with a novel mutation in FERMT3. *Pediatr Allergy Immunol Off Publ Eur Soc Pediatr Allergy Immunol*. 2016;27(2):214–217.
23. Suratannon N, Yeetong P, Srichomthong C, et al. Improvement of Recurrent Infections after IVIG Supplementation in a Patient with Leukocyte Adhesion Deficiency III with a Novel



Missense Mutation in FERMT3. *J Allergy Clin Immunol*. 2015;135(2):AB183-AB183.

24. Suratannon N, Chatchatee P, Yeetong P, et al. Adaptive Immune defect in a rare phagocytic disorder: leukocyte adhesion deficiency III with a novel missense mutation in FERMT3. *Allergy*. 2014;69:500–500.

25. Palagano E, Slatter MA, Uva P, et al. Hematopoietic stem cell transplantation corrects osteopetrosis in a child carrying a novel homozygous mutation in the FERMT3 gene. *Bone*. 2017;97:126–129.

26. Taaning E, Shah B, Schejbel L, et al. Leukocyte adhesion deficiency type III due to a novel mutation in the FERMT3 gene. *Vox Sang*. 2012;103:270–270.

27. Shah B, Taaning E, Schejbel L, et al. Leukocyte adhesion deficiency type III due to a novel mutation in the FERMT3 Gene. *J Clin Immunol*. 2012;32:215–216.

28. Chiesa R, Veys P. Reduced-intensity conditioning for allogeneic stem cell transplant in primary immune deficiencies. *Expert Rev Clin Immunol*. 2012;8(3):255–266; quiz 267.

29. Robert P, Canault M, Farnarier C, et al. A novel leukocyte adhesion deficiency III variant: kindlin-3 deficiency results in integrin- and nonintegrin-related defects in different steps of leukocyte adhesion. *J Immunol Baltim Md 1950*. 2011;186(9):5273–5283.
